# Supplementary material for: Nanoscale chirality generated in zinc(ii) orthophosphate clusters: evidence by vibrational circular dichroism
Source: Royal Society of Chemistry journal article supplement (doi:10.1039/d4nr03809f), 2024-01-01
Supplement: d4nr03809f1.pdf [file d4nr03809f1.pdf]

## Supporting information

### **Nanoscale chirality generated in zinc(II) orthophosphate clusters: Evidence by vibrational circular dichroism**

Sumio Aisawa,<sup>\*a</sup> Nami Horiguchi,<sup>a</sup> Chika Chida,<sup>a</sup> Jing Sang,<sup>a</sup> Hidetoshi Hirahara,<sup>a</sup> Akihiko Yamagishi<sup>b</sup>  
and Hisako Sato<sup>\*c</sup>

<sup>a</sup> Faculty of Science and Engineering, Iwate University, 4-3-5 Morioka, Iwate 020-8551, Japan  
e-mail: [aisawa@iwate-u.ac.jp](mailto:aisawa@iwate-u.ac.jp)

<sup>b</sup> Faculty of Medicine, Toho University, 5-21-16 Oomori-nishi, Ota-ku, Tokyo, 143-8540, Japan

<sup>c</sup> Faculty of Science Ehime University, 2-5, Bunkyo-cho, Matsuyama, 790-8577, Japan  
e-mail: [sato.hisako.yq@ehime-u.ac.jp](mailto:sato.hisako.yq@ehime-u.ac.jp)

#### **Contents:**

1. XRD patterns and FTIR spectra under various conditions of the mixing method
2. TG/DTA curves under various conditions of the mixing conditions
3. XPS spectra of *R*- or *S*-BNDHP<sup>-</sup>/LZH before and after calcination at 800°C
4. The deconvoluted XPS spectra of *R*-BNDHP<sup>-</sup>/LZH before and after calcination at 800°C
5. SEM images of *R*- or *S*-BNDHP<sup>-</sup>/LZH before and after calcination at 800°C.
6. Experimental solid-state IR and VCD spectra of *R*- and *S*-BNDHPH
7. IR and VCD spectra calculated for the intercalation model
8. IR and VCD spectra calculated for the model clusters truncated from  $\alpha$ - or  $\gamma$ -Zn<sub>3</sub>(PO<sub>4</sub>)<sub>2</sub> crystals
9. IR and VCD spectra calculated for the model clusters composed of  $\alpha$ -Zn<sub>3</sub>(PO<sub>4</sub>)<sub>2</sub> and ZnO at various ratios
10. IR and VCD spectra calculated for the dimer model of zinc(II) orthophosphate cluster

## 1. XRD patterns and FTIR spectra under various conditions of the mixing method

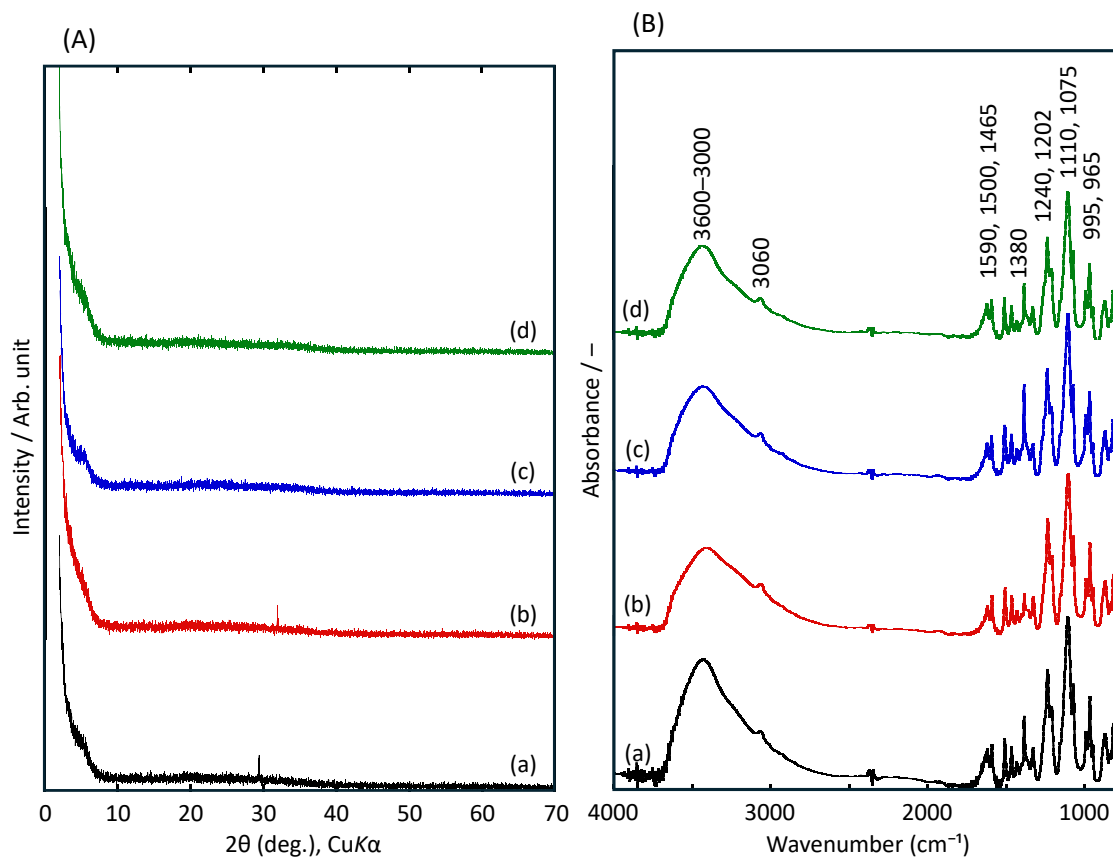

Figure S1. (A) XRD patterns and (B) FT-IR spectra of BNDHP<sup>-</sup>/LZH, respectively: (a) *R*-BNDHP<sup>-</sup>/LZH (pH 3.8, 40°C), (b) *S*-BNDHP<sup>-</sup>/LZH (pH 3.8, 40°C), (c) *R*-BNDHP<sup>-</sup>/LZH (pH 3.8, 60°C) and (d) *S*-BNDHP<sup>-</sup>/LZH (pH 3.8, 60°C).

## 2. TG/DTA curves of under various conditions of mixing conditions

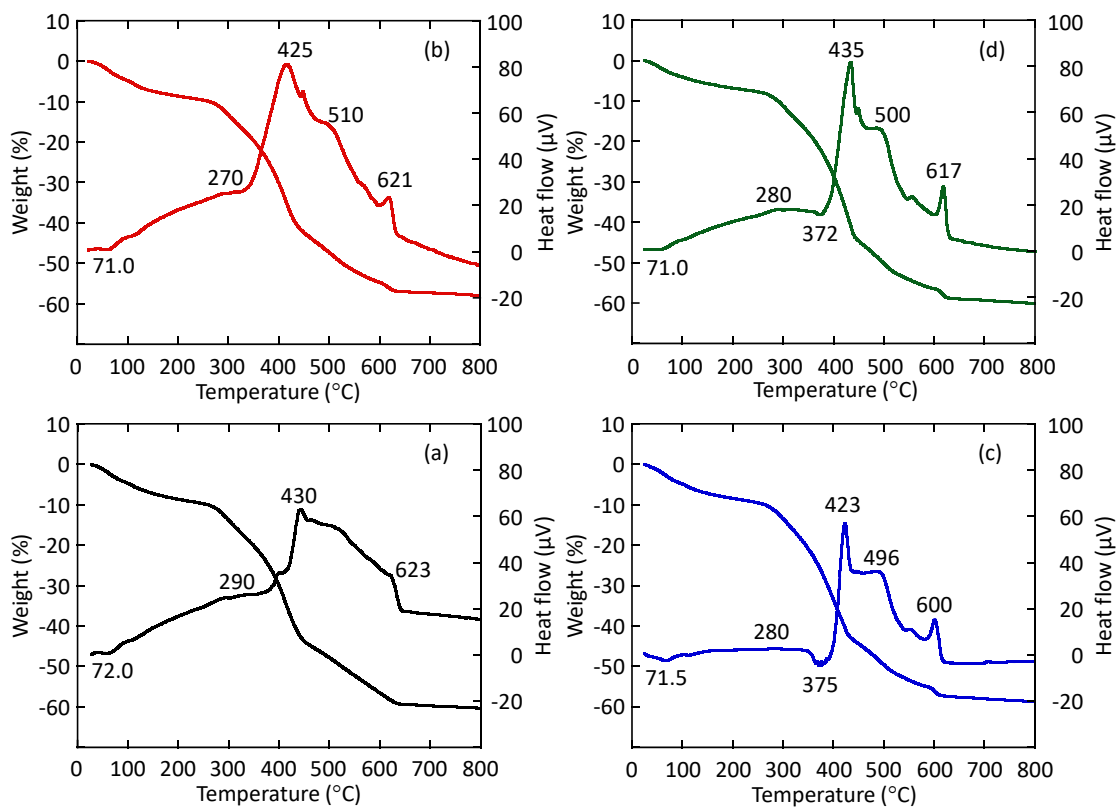

Figure S2. TG/DTA curves of (a) *R*-BNDHP<sup>-</sup>/LZH (pH 3.8, 40°C), (b) *S*-BNDHP<sup>-</sup>/LZH (pH 3.8, 40°C), (c) *R*-BNDHP<sup>-</sup>/LZH (pH 3.8, 60°C) and (d) *S*-BNDHP<sup>-</sup>/LZH (pH 3.8, 60°C).

### 3. XPS spectra of *R*- or *S*-BNDHP/LZH before and after calcination at 800°C

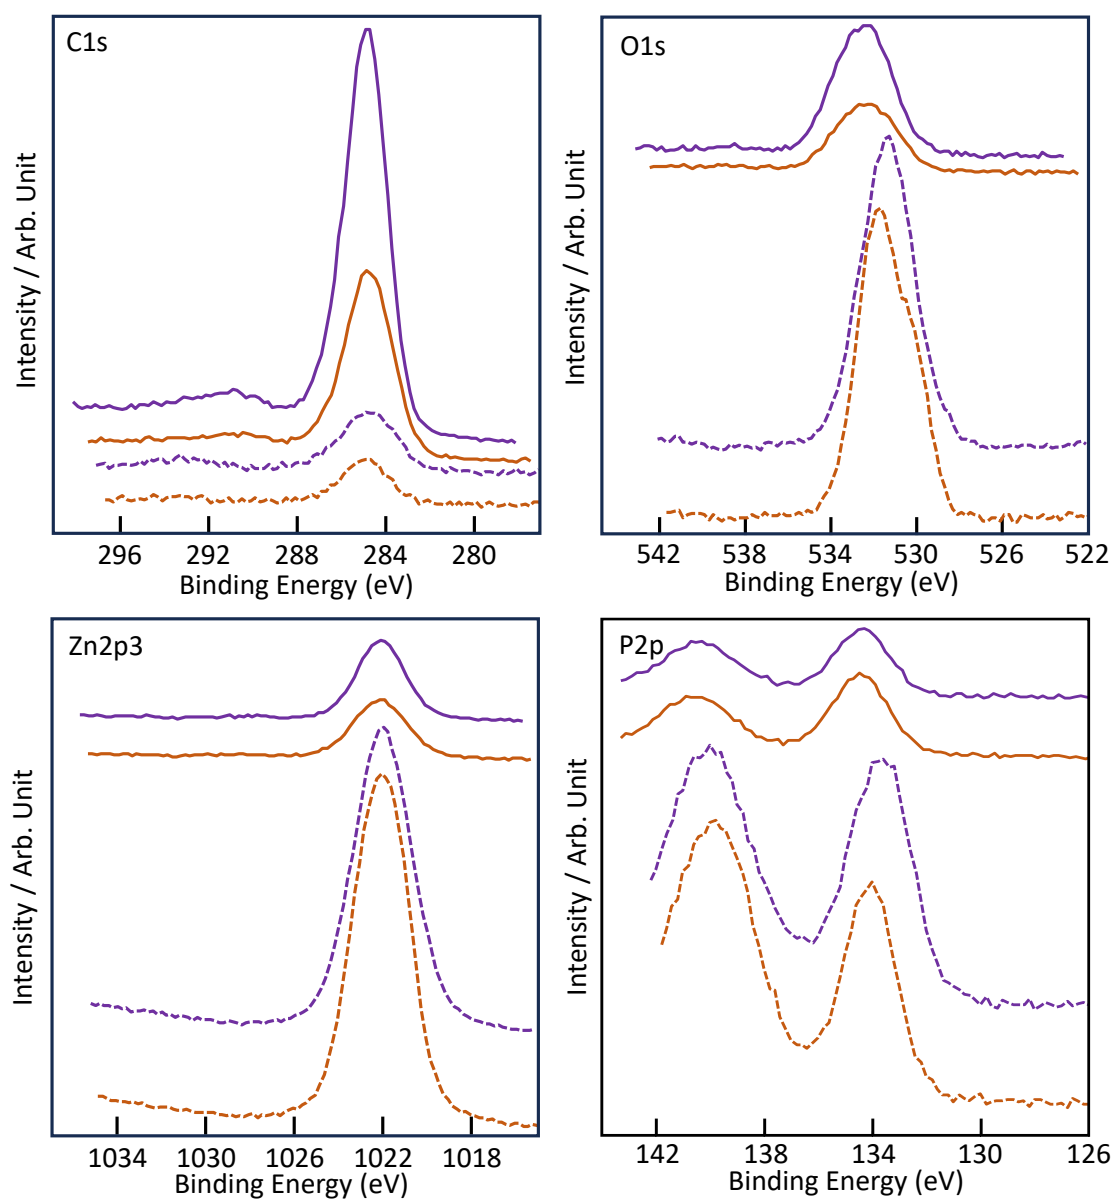

Figure S3. XPS spectra of C1s, O1s, Zn2p3 and P2p of BNDHP<sup>-</sup>/LZH before and after calcination at 800°C: purple and brown lines for *R*-BNDHP<sup>-</sup>/LZH and *S*-BNDHP<sup>-</sup>/LZH, respectively.

#### 4. The deconvoluted XPS spectra of *R*-BNDHP/*LZH* before and after calcination at 800°C

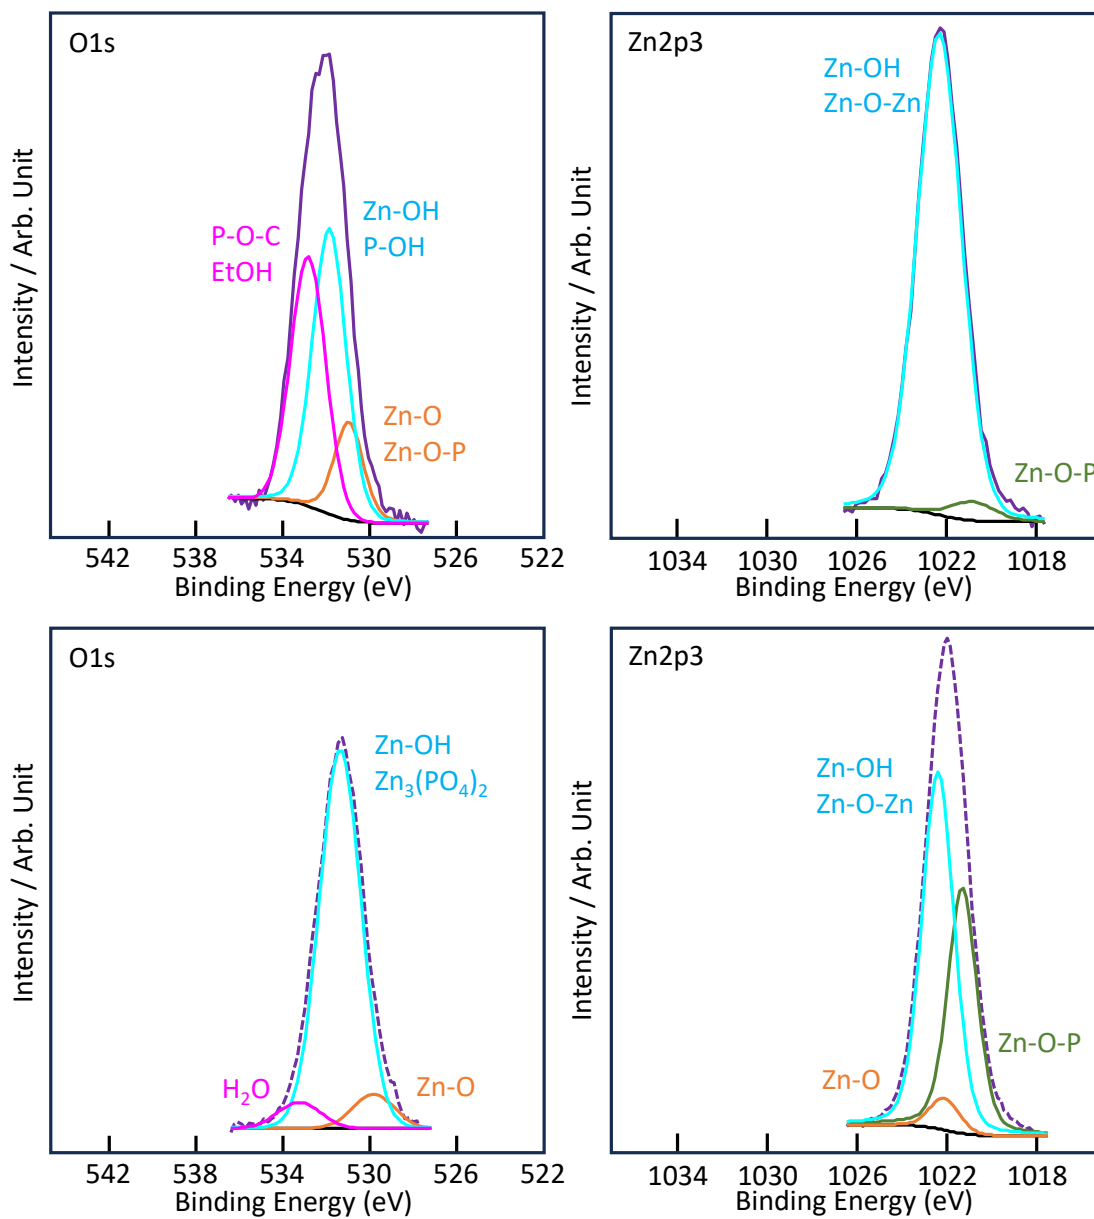

Figure S4. Deconvoluted XPS spectra of O1s (left) and Zn2p3 (right) of *R*-BNDHP/*LZH* before (upper part) and after (lower part) calcination at 800°C, respectively.

**5. SEM images of *R*- or *S*-BNDHP<sup>-</sup>/LZH before and after calcination at 800°C**

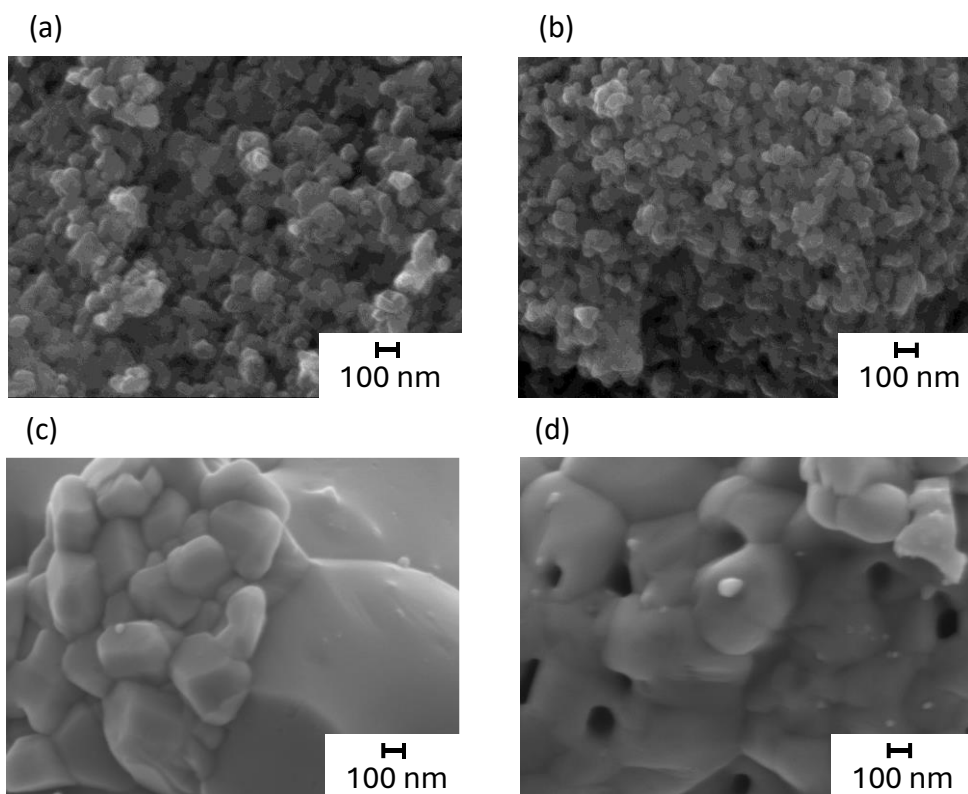

Figure S5. SEM images of (a) *R*-BNDHP<sup>-</sup>/LZH (pH 5.0, 60°C), (b) *S*-BNDHP<sup>-</sup>/LZH (pH 5.0, 60°C), (c) *R*-BNDHP<sup>-</sup>/LZH (pH 5.0, 60°C) after calcination at 800°C and (d) *S*-BNDHP<sup>-</sup>/LZH (pH 5.0, 60°C) after calcination at 800°C.

## 6. Experimental solid-state IR and VCD spectra of *R*- and *S*-BNDHPH

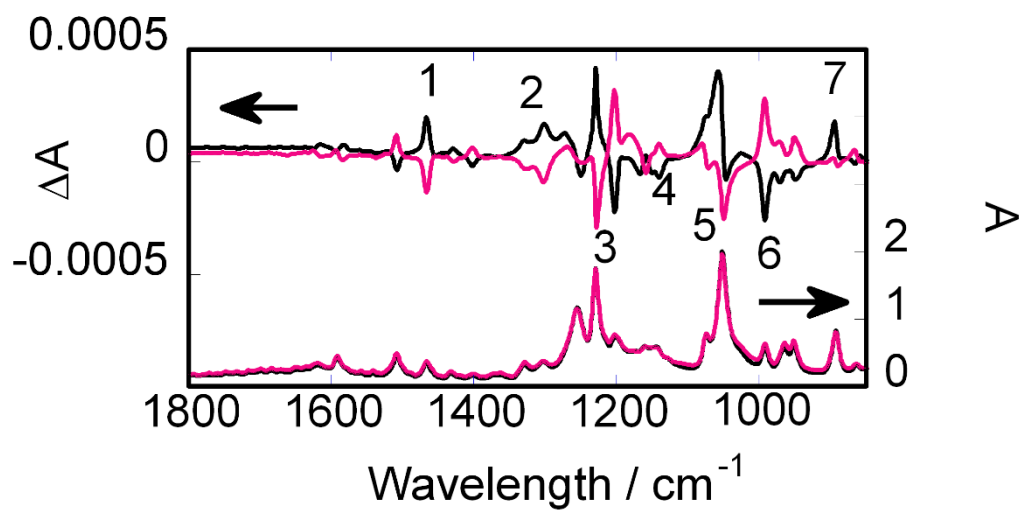

Figure S6. Experimental IR (lower) and VCD (upper) spectra: black and red curves are *R*-BNDHPH and *S*-BNDHPH of KBr pellets, respectively. Numbers show the correspondence between experimental of *R*-BNDHPH-/LZH and *S*-BNDHPH-/LZH in the text (Figure 4).

## 7. IR and VCD spectra calculated for the intercalation model

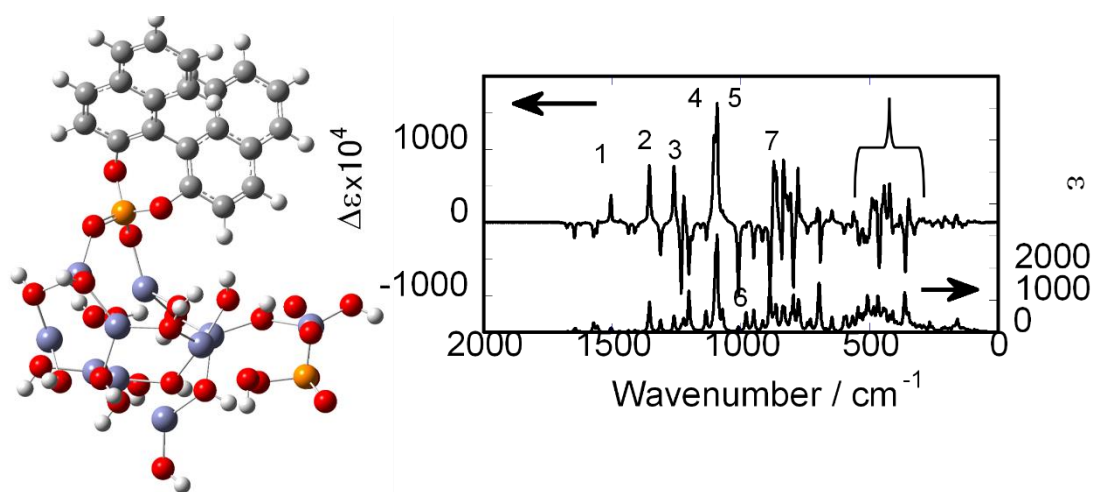

Figure S7. IR and VCD spectra calculated for the model clusters truncated LZH. *R*-BNDHP<sup>-</sup> + PO<sub>4</sub><sup>-</sup> / (Zn(OH)<sub>2</sub>)<sub>10</sub>. The blanketed region shows the induction of chirality around Zn ions due to the chiral organic ligands.



## 8. IR and VCD spectra calculated for the model clusters truncated from $\alpha$ - or $\gamma$ - $\text{Zn}_3(\text{PO}_4)_2$ crystal

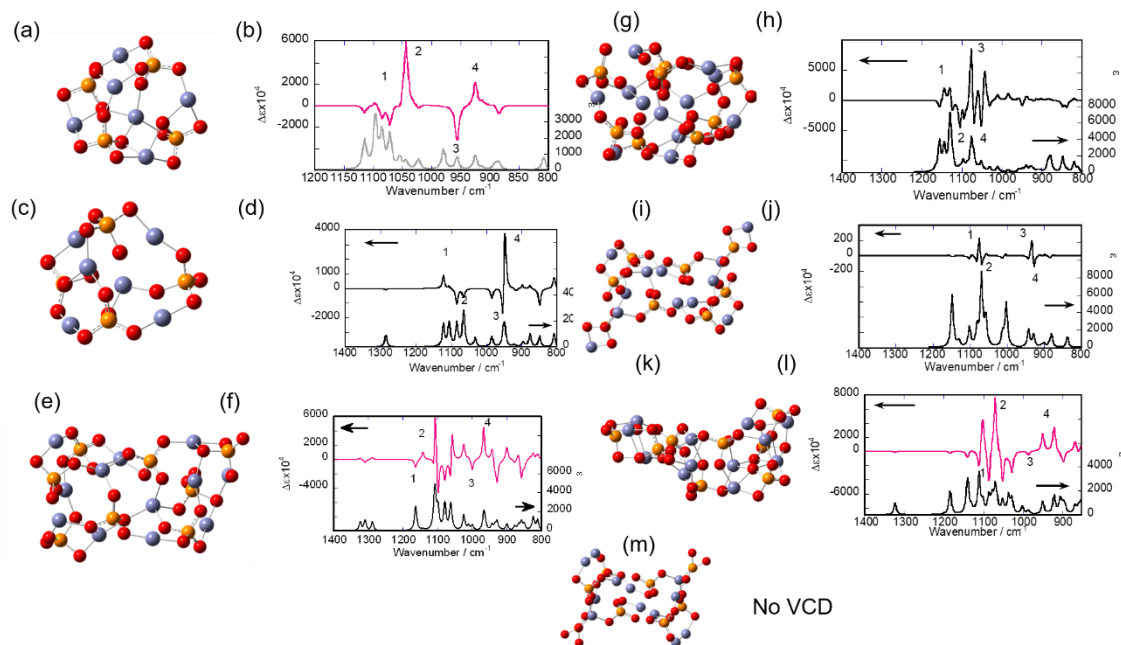

Figure S8. IR and VCD spectra calculated for the model clusters truncated from  $\alpha$ - or  $\gamma$ - $\text{Zn}_3(\text{PO}_4)_2$  crystal. Red and black spectra correspond to the ones experimentally observed for the products calculated from *S*-BNDHP/LZH and *R*-BNDHP/LZH, respectively. The clusters are constructed as below:

- (a) 2 units of  $\{\text{Zn}_3(\text{PO}_4)_2\}$  from  $\gamma$ - $\text{Zn}_3(\text{PO}_4)_2$  crystal,
- (b) IR and VCD spectra calculated for cluster (a),
- (c) 2 units of  $\{\text{Zn}_3(\text{PO}_4)_2\}$  from  $\alpha$ - $\text{Zn}_3(\text{PO}_4)_2$  crystal,
- (d) IR and VCD spectra for cluster (c),
- (e) 4 units of  $\{\text{Zn}_3(\text{PO}_4)_2\}$  from  $\alpha$ - $\text{Zn}_3(\text{PO}_4)_2$  crystal (type I),
- (f) IR and VCD spectra for cluster (f),
- (g) 4 units of  $\{\text{Zn}_3(\text{PO}_4)_2\}$  from  $\alpha$ - $\text{Zn}_3(\text{PO}_4)_2$  crystal (type II),
- (h) IR and VCD spectra for cluster (g),
- (i) 4 units of  $\{\text{Zn}_3(\text{PO}_4)_2\}$  from  $\alpha$ - $\text{Zn}_3(\text{PO}_4)_2$  crystal (type III),
- (j) IR and VCD spectra for cluster (i),
- (k) 4 units of  $\{\text{Zn}_3(\text{PO}_4)_2\}$  from  $\alpha$ - $\text{Zn}_3(\text{PO}_4)_2$  crystal (type IV),
- (l) IR and VCD spectra for cluster (k).
- (m) 4 units of  $\{\text{Zn}_3(\text{PO}_4)_2\}$  from  $\alpha$ - $\text{Zn}_3(\text{PO}_4)_2$  crystal (type V). The cluster was predicted to be VCD-inactive by calculation.

## 9. IR and VCD spectra calculated for the model clusters composed of $\alpha$ - $Zn_3(PO_4)_2$ and ZnO at various ratios

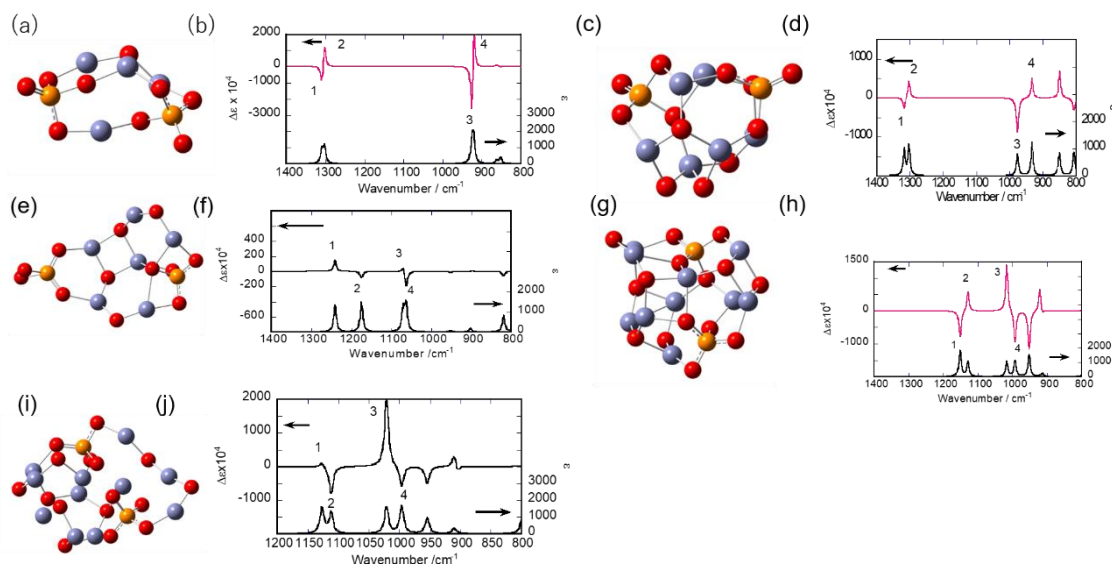

Figure S9. IR and VCD spectra calculated for the model clusters constructed from the combination of  $\alpha$ - $Zn_3(PO_4)_2$  and ZnO at various ratios. Red and black spectra are correspondent to the ones experimentally observed for the products calcinated from *S*-BNDHP/LZH and *R*-BNDHP/LZH, respectively. The clusters were constructed according to the following combination:

- (a) 1:1 of  $Zn_3(PO_4)_2$  and ZnO,
- (b) IR and VCD spectra calculated for cluster (a),
- (c) 1:3:1 of  $Zn_3(PO_4)_2$ , ZnO and O (spherical type),
- (d) IR and VCD spectra calculated for cluster (c),
- (e) 1:3:1 of  $Zn_3(PO_4)_2$ , ZnO and O (planar type),
- (f) IR and VCD spectra calculated for cluster (e),
- (g) 1:7 of  $Zn_3(PO_4)_2$  and ZnO,
- (h) IR and VCD spectra calculated for cluster (g),
- (i) 1:8 of  $Zn_3(PO_4)_2$  and ZnO,
- (j) IR and VCD spectra calculated for cluster (i).

## 10. VCD and IR spectra calculated for the dimer model of zinc(II) orthophosphate cluster

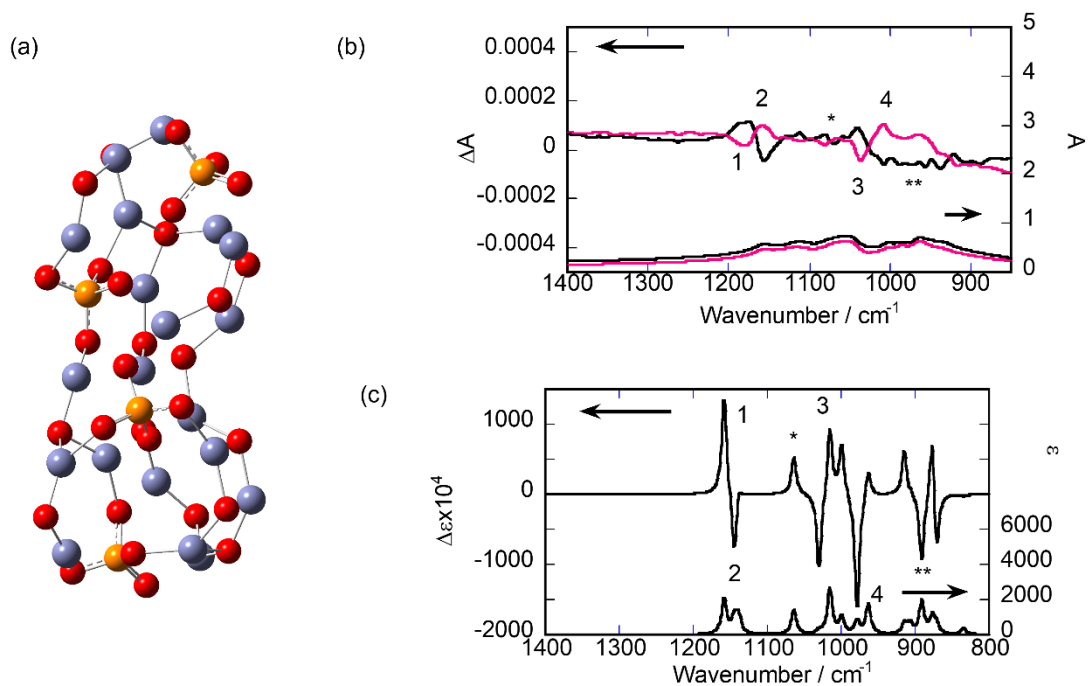

Figure S10. VCD and IR spectra calculated for a dimeric zinc(II) orthophosphate cluster. The optimized structure of a cluster is composed of two units of  $\{\text{Zn}_3(\text{PO}_4)_2(\text{ZnO})_7\}$ . (a) The experimentally observed IR and VCD spectra of the calcinated samples, when the starting compounds were *R*-BNDP/LZH (red) and *R*-BNDP/LZH (black), respectively. (b) The calculated IR (lower) and VCD (lower) spectra for the dimeric model shown in (a). Two couplets (numbered as 1, 2 and 3, 4) and small peaks around  $1100 \text{ cm}^{-1}$  were reproduced as experimentally observed by the black curve in (b).
